# Supplementary material
Source: PubMed Central journal article supplement (PMC3436322)
Supplement: supp_M112.390120_jbc.M112.390120-1.pdf [file supp_M112.390120_jbc.M112.390120-1.pdf]

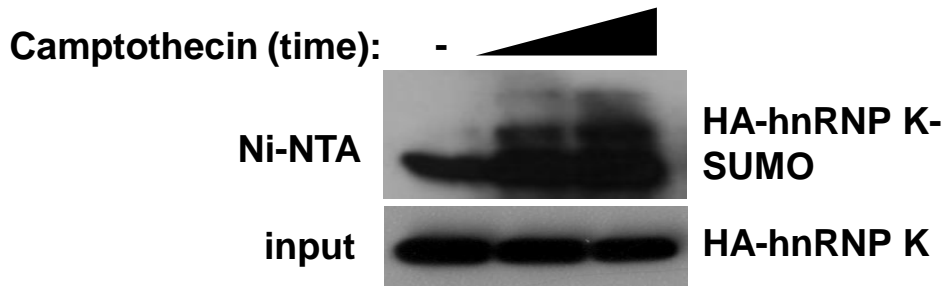

**Supplemental Figure 1.** HCT-116 cells were transfected with HA-tagged hnRNP K together with 6xHis-tagged SUMO-2 and 48 h later they were left untreated or treated with 6  $\mu$ M camptothecin for 1 or 4 hs. SUMO conjugation to hnRNP K was analyzed by Ni<sup>2+</sup> affinity chromatography.

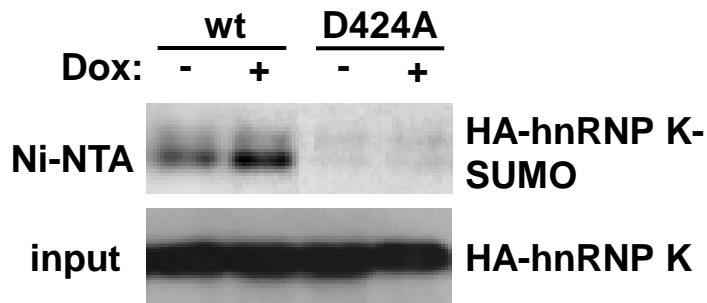

**Supplemental Figure 2.** Doxorubicin-induced hnRNP K sumoylation depends on the sumoylation consensus sequence 421-IKID-424. HEK 293T cells were transfected with HA-tagged hnRNP K together with 6xHis-tagged SUMO-2 and 48 h later they were left untreated or treated with doxorubicin for 4 h. SUMO conjugation to hnRNP K was analyzed by Ni<sup>2+</sup> affinity chromatography.
